# Supplementary material for: Contributions of different sources to nitrous acid (HONO) at the SORPES station in eastern China: results from one-year continuous observation
Source: Copernicus journal article supplement (doi:10.5194/acp-2019-219), 2019-04-25
Supplement: Supplementary file [file acp-2019-219-AC2-supplement.pdf]

### Referee #3

This manuscript describes continuous ambient measurements of HONO, NO, NO<sub>2</sub>, and PM<sub>2.5</sub> at the SORPES station in Nanjing (eastern China) from November 2017 to November 2018. The main conclusions are:

1. Seasonal average HONO concentrations are comparable to other urban/suburban regions (0.45-1.04 ppb). 2. Direct emissions from combustion sources explain nearly 25% of nocturnal HONO concentrations. The authors determined this by examining fresh plumes. 3. Nocturnal HONO formation is RH-dependent and largely explained by heterogeneous surface chemistry. 4. A missing diurnal HONO formation mechanism is a significant source of HONO around noon (average 1.13 ppb/hr).

There are not many long-term records of ambient HONO measurements, and this manuscript provides a valuable dataset to the scientific community. It is well within the scope of ACP and will likely be of interest to ACP readers. I recommend publication after the authors address the following comments.

***-Figure 6 shows the HONO/NO<sub>2</sub> ratio as a function of RH. The authors state that Fig 6a represents measurements when available surface area is dominated by the ground (i.e., relatively low surface area contributions from aerosols). Can the authors quantify the relative contributions to total surface area from the ground and aerosols? What percentage of the total surface area does the ground represent in clean air and polluted air?***

Response: Thanks for the comment and suggestion.

We calculated aerosol surface density from the particle number size distributions between 6 nm and 820 nm, by assuming that all particles are spherically shaped. and We calculated ground surface density through the equation:  $(\frac{S}{V})_{\text{grd}} = \frac{1}{H}$ , where H is the height of boundary layer, and a value of 100m is assumed for nighttime (Su et al., 2008). As the following figure shows, the surface area to volume ratio of ground is dominant, but under the condition of severe pollution, the aerosol can contribute about 10% of the total surface area. Besides the surface area, the conversion of NO<sub>2</sub> to HONO should also be determined by the surface reactivity, i.e. the uptake coefficient of NO<sub>2</sub>-to-HONO ( $\gamma_{\text{NO}_2 \rightarrow \text{HONO}}$ ). Differ from the prolonged exposure to oxidizing agents and radiation of the ground surface, the aerosol surface is relatively more fresh, and possibly more reactive. For example, the reduction of NO<sub>2</sub> in the presence of water by C–O and C–H groups in the soot is proposed to produce HONO quickly (Ammann et al., 1998). In our study, in case we assume that all of the observed HONO is formed on particle surfaces at night, the derived  $\gamma_{\text{NO}_2 \rightarrow \text{HONO}}$  is  $1.44 \times 10^{-5}$ , within a reasonable range of laboratory measurements.

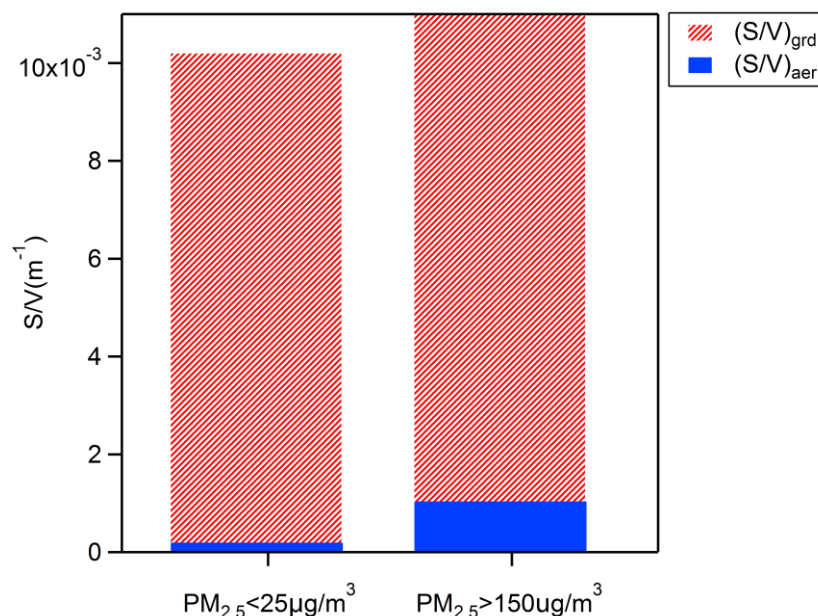

the averaged surface area to volume ratio ( $\text{m}^{-1}$ ) of ground and aerosol in clean air ( $\text{PM}_{2.5} < 25 \mu\text{g}/\text{m}^3$ ) and polluted air ( $\text{PM}_{2.5} > 150 \mu\text{g}/\text{m}^3$ )

Line 481-487: For 30%-100% of the measured mean  $C_{\text{HONO}}$  ( $0.0043 \text{ h}^{-1}$ ) in winter, the uptake coefficient of  $\text{NO}_2$ -to-HONO ( $\gamma_{\text{NO}_2 \rightarrow \text{HONO}}$ ) calculated from Eq. (8) is in the range of  $6.9 \times 10^{-6}$  to  $1.44 \times 10^{-5}$ , consistent with the results from many laboratory studies which demonstrate that the uptake coefficients of  $\text{NO}_2$  ( $\gamma_{\text{NO}_2}$ ) on multiple aerosol surfaces or wet surfaces are mainly distributed around  $10^{-5}$  with the HONO yield varying from 0.1 to 0.9 (Grassian, 2002; Aubin and Abbatt, 2007; Khalizov et al., 2010; Han et al., 2017).

**-As shown in Figure 6, HONO/NO<sub>2</sub> ratios in polluted air do not decline at RH between 75-95% as is seen in clean air. The authors should provide some explanation here. Why is there a different RH dependency under high PM<sub>2.5</sub> conditions?**

Response: Thanks for the comment and suggestion. We have added some discussion into the revised manuscript.

Line 427-438: With the increase of RH, the hygroscopic growth of aerosol particles should provide larger surface area. When RH is higher than 75%, which has exceeded the mutual deliquescence relative humidity of inorganic salts (Fountoukis and Nenes, 2007), aerosols will transfer to aqueous phase gradually, and then promoting multiphase or heterogeneous chemistry processes (Herrmann et al., 2015). For example, the oxidation of  $\text{SO}_2$  by  $\text{NO}_2$  on aqueous aerosol surface may produce  $\text{NO}_2$ /HONO efficiently under polluted condition (Xie et al., 2015; Wang et al., 2016). In addition, the enhancement  $\text{NO}_2$  uptake on micro-droplets by anions has been reported in experiments (Yabushita et al., 2009).

***-The authors claim that the unknown daytime HONO production is different from the heterogeneous nocturnal production (section 3.4). It is not immediately clear how the authors reach this conclusion. They should expand on this statement and provide clear justification.***

Response: Thanks for the comment and suggestion. The highest noontime  $P_{\text{unknown}}$  value is 1.72 ppb/h in spring, followed by 1.11 ppb/h in summer, 0.66 ppb/h in autumn and 0.58 ppb/h in autumn, unlike the seasonal variation of  $\text{NO}_2$ ; and  $P_{\text{unknown}}$  shows an increase towards noon, which is also distinguished from the diurnal pattern of  $\text{NO}_2$ . These results indicate that there must be some other factors affecting  $P_{\text{unknown}}$ , in case  $\text{NO}_2$  is assumed to be a dominate precursor of HONO at daytime

*Line 558-561: The average value of  $P_{\text{unknown}}$  normalized by  $\text{NO}_2$  is  $0.1 \text{ h}^{-1}$ , over 18 times greater than the nighttime conversion rate ( $0.0055 \text{ h}^{-1}$ ), also implying that  $P_{\text{unknown}}$  cannot be explained by the nocturnal mechanism of  $\text{NO}_2$ -to-HONO.*

***-A major justification for assuming an unknown HONO source is that the HONO/ $\text{NO}_2$  ratio rises around noon at peak solar radiation. I have two problems with this that the authors should address. First, any ratio with  $\text{NO}_2$  in the denominator will increase as  $\text{NO}_2$  is photolyzed at greater rates. Second – and this is the more serious concern – is that 3-D air quality models predict an increase in HONO/ $\text{NO}_2$  ratios in the late morning through noon, but they certainly aren't influenced by missing HONO sources (e.g. Figure 8 in <http://dx.doi.org/10.1016/j.atmosenv.2015.04.048>). While there may well be a significant unknown HONO source during the day, relying on HONO/ $\text{NO}_2$  ratios does not sufficiently make the case.***

Response: Thanks for the comments.

For first problem, we agree that the greater rates of  $\text{NO}_2$  can also increase the HONO/ $\text{NO}_2$  ratio. If just considering of the photolysis of HONO and  $\text{NO}_2$ , both of which will convert to NO, the loss of HONO and the almost unchanged concentration of  $\text{NO}_x$  ( $\text{NO}_2 + \text{NO}$ ) will reduce the ratio HONO/ $\text{NO}_x$ . So we actually use the ratio HONO/ $\text{NO}_x$  to present the conversion of  $\text{NO}_x$  to HONO partly (please see Fig.1 and Fig. 2 in the revised manuscript).

For second problem, the increase of HONO/ $\text{NO}_x$  at daytime can result from: (1) the homogeneous reaction of NO and OH radical (R3); (2) the conversion of  $\text{NO}_2$  to HONO (R4, R5); (3) other  $\text{NO}_x$ -independent sources. In the work of Couzo et al. (2015) (Figure 8 in <http://dx.doi.org/10.1016/j.atmosenv.2015.04.048>), when they only considered R3, the predicted daytime HONO/ $\text{NO}_2$  can follow the time variation of the measured ratio but underestimate significantly, and after include the heterogeneous formation from  $\text{NO}_2$  (R4, R5) and  $\text{HNO}_3$  (R6), the simulated HONO/ $\text{NO}_2$  was improved during daytime, but significantly contradicted with the observed value in the second half of the night. Until now, the heterogeneous reaction mechanisms (R4, R5, R6) are actually not clear yet, there are uncertainties involved with the parameterizations in various models, many simulation works still tend to underestimate HONO concentrations (Czader et al., 2012; Lee et al., 2016).

The missing source ( $P_{\text{unknown}}$ ) defined in our study contains the heterogeneous processes mentioned above. We want to understand which mechanism might be more important based on our measurements. The source of HONO is divided into gas phase reaction (R3), combustion emission and unknown source  $P_{\text{unknown}}$ . So both the homogeneous formation and unknown source of HONO can increase the HONO/NO<sub>x</sub> ratio at daytime, with a mean value of 0.71 ppb/h and 1.02 ppb/h, respectively.  $P_{\text{unknown}}$  has found to correlated with NO<sub>2</sub>\*UVB, indicating the photo-induced heterogeneous conversion of NO<sub>2</sub> to HONO, but for now we do not have any solid evidence to identify which surface (ground surface and aerosol surface) are important in this potential mechanism.

Line 534:

$$P_{\text{unknown}} = J(\text{HONO})[\text{HONO}] + k_{\text{HONO}+\text{OH}}[\text{HONO}][\text{OH}] + \frac{V_{\text{HONO}}}{H}[\text{HONO}] + \frac{\Delta\text{HONO}}{\Delta t} - k_{\text{NO}+\text{OH}}[\text{NO}][\text{OH}] - \frac{0.79\% \times \Delta\text{NO}_x}{\Delta t} \quad (10)$$

Line 261-264: If the HONO sources during daytime are consistent with those at night, the minimum HONO/NO<sub>x</sub> ratios should occur at noon due to the intense photochemical loss of HONO. Therefore, there must be additional sources of HONO during daytime (e.g. R3).

Line 539-542: the average homogeneous reaction rate between NO and OH ( $P_{\text{NO}+\text{OH}}$ ) is 0.71 ppb/h and  $P_{\text{emis}}$  just gives a tiny part of HONO at a rate of 0.02 ppb/h, meaning that most of HONO comes from an unknown source whose average rate ( $P_{\text{unknown}}$ ) is 1.02 ppb/h, contributing about 58% of the production of HONO.

**-Assuming the existence of a missing HONO source during the day, to what extent could it be explained by soil emissions?**

Response: Thanks for the comment and suggestion.

The averaged missing source calculated in our study is 1.02 ppb/h around noon (10:00-14:00 LT). So far, we cannot exclude the potential contribution from (photo-enhanced) heterogeneous reaction of NO<sub>2</sub>, and the photolysis of adsorbed nitric acid (HNO<sub>3</sub>) and particulate nitrate (NO<sub>3</sub><sup>-</sup>). It's difficult to derive the rate or the amount of HONO emitted from soil emission, the main reason is that we were lack of direct observation. However, we are still trying to estimate the contribution of soil emissions to HONO through solving overdetermined equations at night, due to the relatively simple sources of HONO and without the influences of HONO photolysis, and the mixing effect of boundary layer (see part 4 in the revised manuscript for details). And, in average, 14.5% of nighttime HONO is found to be explained by soil emissions. The key to our calculation is the assumption that the mixing level of observed NH<sub>3</sub> can represent the intensity of soil emission of HONO. Although the processes of HONO and NH<sub>3</sub> emission from soil may not be completely synchronized, the seasonal patterns for each should be consistent.

*Line 602-614: Although we do not directly measure HONO emissions from soil, the observed ammonia can represent its monthly average intensity, based on the following hypothesis: the dominant source of NH<sub>3</sub> is from soil, especially from fertilizers (NH<sub>4</sub><sup>+</sup>→NH<sub>3</sub>) for a good correlation between ammonia and temperature in the site (r=0.63, p=0.01), omitting the contributions of livestock to NH<sub>3</sub> since there is only a small poultry facility within 10 km of this site (Meng et al., 2011;Huang et al., 2012;Behera et al., 2013). Combustion sources (vehicles, industry, biomass burning) should contribute only a fraction of NH<sub>3</sub> seeing that NH<sub>3</sub> is not related to NO<sub>x</sub> or CO in our study. Moreover, the release of both HONO and NH<sub>3</sub> depend on the strength of microbial activities, fertilizing amount, and soil properties (e.g., temperature, acidity and water content of soil). Although the processes of HONO and NH<sub>3</sub> emission from soil may not be completely synchronized, the seasonal patterns for each should be consistent.*

***-The authors state that mass concentration of PM<sub>2.5</sub> is likely not the only factor affecting HONO formation on aerosol surfaces. This makes sense intuitively. Do the authors have speciated PM<sub>2.5</sub> measurements during this time? How does the chemical composition of aerosols change throughout the year? Would these changes make the NO<sub>2</sub> to HONO conversion more or less likely?***

Response: Thanks for the comment and suggestion.

The seasonal variation of aerosol compositions has been reported in our previously work, showed in the following first figure: the particulate nitrate exhibits a maximum value in January and a minimum in August, and particulate sulfate shows a relatively weak seasonal cycle (Sun et al., 2018). An intuitive conclusion is that the proportion of nitrate will increase and the proportion of sulfate will decrease with the aerosol loading, from summer to winter.

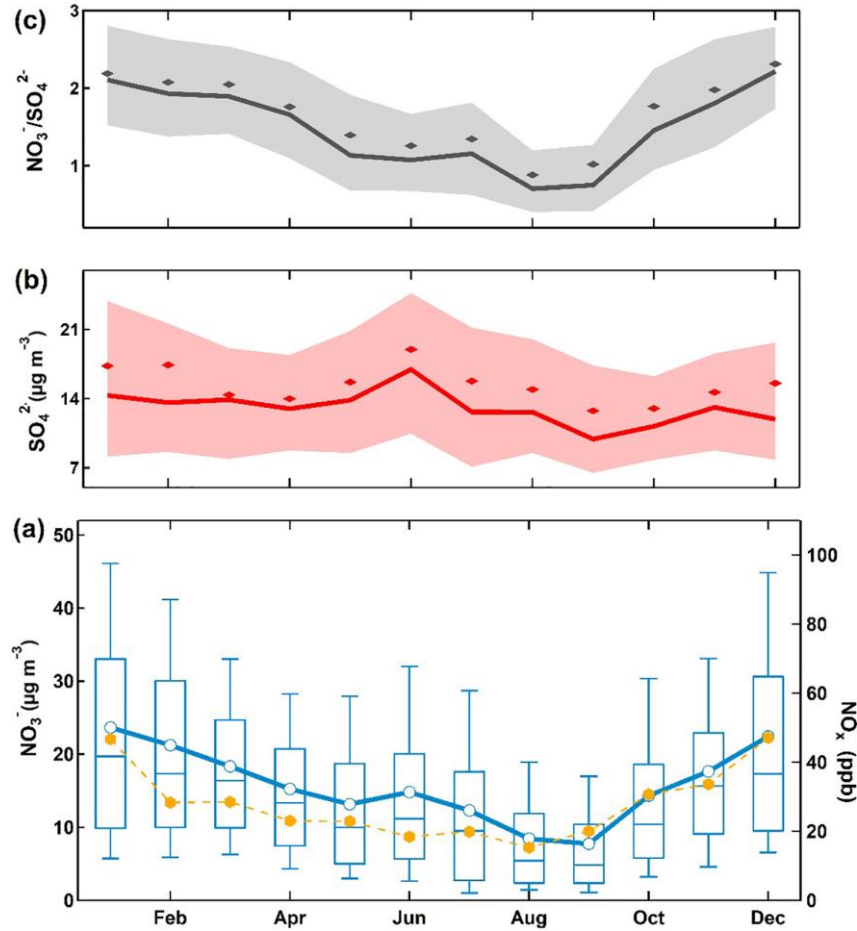

Monthly averaged nitrate (blue), sulfate (red), NO<sub>x</sub> (orange) mass concentrations and nitrate to sulfate molar-based ratio (grey) measured at the SORPES station during March 2014 to February 2016 (Sun et al., 2018).

The slope of HONO<sub>corr</sub>/NO<sub>2</sub> and PM<sub>2.5</sub> varies over a relatively wide range, caused by some unknown factors that need to be explored. As the following figure shows, when the proportion of nitrate in aerosol is higher, the slope of HONO<sub>corr</sub>/NO<sub>2</sub> and PM<sub>2.5</sub> tend to be lower slightly while the relationship shows differently for sulfate. The value of (PM<sub>2.5</sub>-NO<sub>3</sub><sup>-</sup>-SO<sub>4</sub><sup>2-</sup>-NH<sub>4</sub><sup>+</sup>)/PM<sub>2.5</sub> can roughly represent the ratio of organic compounds in most situations, and it seems that the high ratio of organic aerosol occurs with the high slope of HONO<sub>corr</sub>/NO<sub>2</sub> and PM<sub>2.5</sub>. But simply relying on these cannot make too much sense, for example, the heat can make particulate nitrate volatilize into nitric acid gas and cause soil to emit more HONO, so we can see the highest HONO<sub>corr</sub>/NO<sub>2</sub> ratio and the lowest proportion of nitrate to aerosol in summer. In future work, we're going to study the impact of aerosol components to the heterogeneous formation of HONO through laboratory experiments.

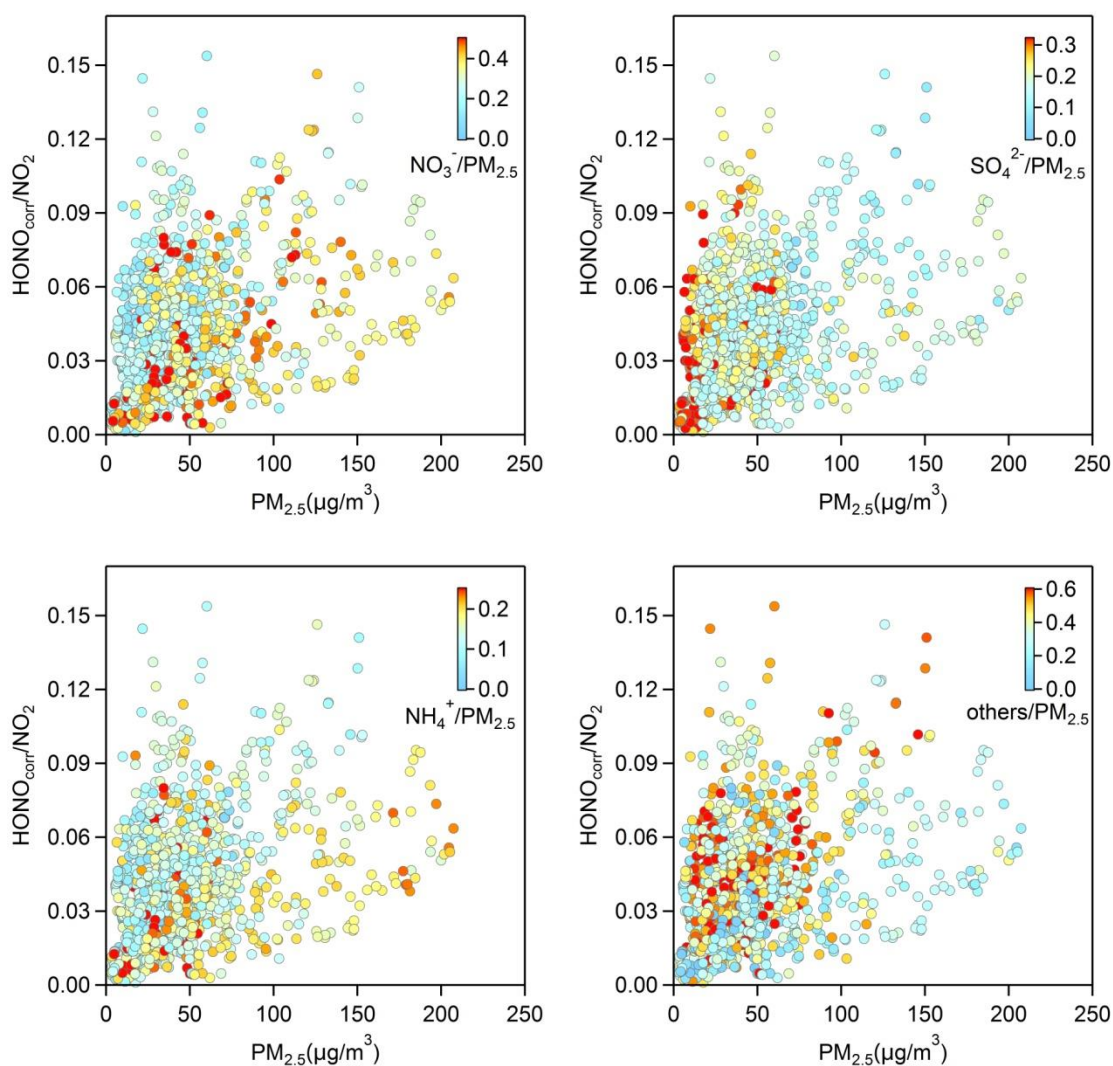

Scatter plot of  $\text{HONO}_{\text{corr}}/\text{NO}_2$  and  $\text{PM}_{2.5}$  in the time (3:00-6:00 LT) when  $\text{HONO}_{\text{corr}}/\text{NO}_2$  reaches the pseudo steady state each night and are colored by the ratios of main aerosol compositions: (a)  $\text{NO}_3^-/\text{PM}_{2.5}$ , (b)  $\text{SO}_4^{2-}/\text{PM}_{2.5}$ , (c)  $\text{NH}_4^+/\text{PM}_{2.5}$ , (d) others/ $\text{PM}_{2.5}$ , i.e.  $(\text{PM}_{2.5}-\text{NO}_3^--\text{SO}_4^{2-}-\text{NH}_4^+)/\text{PM}_{2.5}$ .

**Other minor comments:**

-Check the in-text references to Figures and Tables. Some of the Figures are mis-referenced (e.g. referencing Fig 5 when, in fact, the figure being referenced is Fig 6). This happens quite often in the latter half of the manuscript.

Response: Thanks. We have re-edited the references to Figures and Tables in the revised manuscript.

- The last sentence in the second paragraph of section 3.3.2 is particularly confusing.

Response: Thanks. We have re-edited the language in the revised manuscript.

Line 393-398: Even at the lowest measured RH of 18%, the absolute moisture content in the atmosphere is still greater than  $10^3$  ppm in our study, which is quite abundant to react with

*NO<sub>2</sub>, but the HONO<sub>corr</sub>/NO<sub>2</sub> ratio is quite small and remains unchanged when RH is below 45%, indicating that the NO<sub>2</sub> to HONO conversion efficiency should be determined by water covering the surfaces, rather than by the amount of water in the air.*

***-To improve readability, try to have a native English speaker proofread the manuscript. Some of the phrases are oddly worded and obscure the authors' meaning.***

Response: Thanks for the suggestion.

## Reference

- Ammann, M., Kalberer, M., Jost, D., Tobler, L., Rössler, E., Piguet, D., Gaggeler, H., and Baltensperger, U.: Heterogeneous production of nitrous acid on soot in polluted airmasses, *NATURE*, 395, 157-160, 10.1038/25965, 1998.
- Aubin, D. G., and Abbatt, J. P.: Interaction of NO<sub>2</sub> with hydrocarbon soot: Focus on HONO yield, surface modification, and mechanism, *The Journal of Physical Chemistry A*, 111, 6263-6273, 2007.
- Behera, S. N., Sharma, M., Aneja, V. P., and Balasubramanian, R.: Ammonia in the atmosphere: a review on emission sources, atmospheric chemistry and deposition on terrestrial bodies, *Environ Sci Pollut Res Int*, 20, 8092-8131, 10.1007/s11356-013-2051-9, 2013.
- Couzo, E., Lefer, B., Stutz, J., Yarwood, G., Karamchandani, P., Henderson, B., and Vizuete, W.: Impacts of heterogeneous HONO formation on radical sources and ozone chemistry in Houston, Texas, *Atmos. Environ.*, 112, 344-355, 10.1016/j.atmosenv.2015.04.048, 2015.
- Czader, B. H., Rappenglück, B., Percell, P., Byun, D. W., Ngan, F., and Kim, S.: Modeling nitrous acid and its impact on ozone and hydroxyl radical during the Texas Air Quality Study 2006, *Atmospheric Chemistry and Physics*, 12, 6939-6951, 10.5194/acp-12-6939-2012, 2012.
- Fountoukis, C., and Nenes, A.: ISORROPIA II: a computationally efficient thermodynamic equilibrium model for K<sup>+</sup>-Ca<sup>2+</sup>-Mg<sup>2+</sup>-NH<sub>4</sub><sup>(+)</sup>-Na<sup>+</sup>-SO<sub>4</sub><sup>2-</sup>-NO<sub>3</sub><sup>-</sup>-Cl<sup>-</sup>-H<sub>2</sub>O aerosols, *Atmospheric Chemistry and Physics*, 7, 4639-4659, 10.5194/acp-7-4639-2007, 2007.
- Grassian, V.: Chemical reactions of nitrogen oxides on the surface of oxide, carbonate, soot, and mineral dust particles: Implications for the chemical balance of the troposphere, *The Journal of Physical Chemistry A*, 106, 860-877, 2002.
- Han, C., Liu, Y., and He, H.: Heterogeneous reaction of NO<sub>2</sub> with soot at different relative humidity, *Environmental Science and Pollution Research*, 24, 21248-21255, 10.1007/s11356-017-9766-y, 2017.
- Herrmann, H., Schaefer, T., Tilgner, A., Styler, S. A., Weller, C., Teich, M., and Otto, T.: Tropospheric aqueous-phase chemistry: kinetics, mechanisms, and its coupling to a changing gas phase, *Chem Rev*, 115, 4259-4334, 10.1021/cr500447k, 2015.
- Huang, X., Song, Y., Li, M., Li, J., Huo, Q., Cai, X., Zhu, T., Hu, M., and Zhang, H.: A high-resolution ammonia emission inventory in China, *Global Biogeochemical Cycles*, 26, n/a-n/a, 10.1029/2011gb004161, 2012.
- Khalizov, A. F., Cruz-Quinones, M., and Zhang, R.: Heterogeneous reaction of NO<sub>2</sub> on fresh and coated soot surfaces, *The Journal of Physical Chemistry A*, 114, 7516-7524, 2010.
- Lee, J. D., Whalley, L. K., Heard, D. E., Stone, D., Dunmore, R. E., Hamilton, J. F., Young, D. E., Allan, J. D., Laufs, S., and Kleffmann, J.: Detailed budget analysis of HONO in central London reveals a missing daytime source, *Atmospheric Chemistry and Physics*, 16, 2747-2764, 10.5194/acp-16-2747-2016, 2016.



Meng, Z., Lin, W., Jiang, X., Yan, P., Wang, Y., Zhang, Y., Jia, X., and Yu, X.: Characteristics of atmospheric ammonia over Beijing, China, *Atmospheric Chemistry and Physics*, 11, 6139-6151, 2011.

Su, H., Cheng, Y. F., Cheng, P., Zhang, Y. H., Dong, S., Zeng, L. M., Wang, X., Slanina, J., Shao, M., and Wiedensohler, A.: Observation of nighttime nitrous acid (HONO) formation at a non-urban site during PRIDE-PRD2004 in China, *Atmos. Environ.*, 42, 6219-6232, 10.1016/j.atmosenv.2008.04.006, 2008.

Sun, P., Nie, W., Chi, X., Xie, Y., Huang, X., Xu, Z., Qi, X., Xu, Z., Wang, L., Wang, T., Zhang, Q., and Ding, A.: Two years of online measurement of fine particulate nitrate in the western Yangtze River Delta: influences of thermodynamics and  $\text{N}_2\text{O}_5$  hydrolysis, *Atmospheric Chemistry and Physics*, 18, 17177-17190, 10.5194/acp-18-17177-2018, 2018.

Wang, G., Zhang, R., Gomez, M. E., Yang, L., Levy Zamora, M., Hu, M., Lin, Y., Peng, J., Guo, S., Meng, J., Li, J., Cheng, C., Hu, T., Ren, Y., Wang, Y., Gao, J., Cao, J., An, Z., Zhou, W., Li, G., Wang, J., Tian, P., Marrero-Ortiz, W., Secret, J., Du, Z., Zheng, J., Shang, D., Zeng, L., Shao, M., Wang, W., Huang, Y., Wang, Y., Zhu, Y., Li, Y., Hu, J., Pan, B., Cai, L., Cheng, Y., Ji, Y., Zhang, F., Rosenfeld, D., Liss, P. S., Duce, R. A., Kolb, C. E., and Molina, M. J.: Persistent sulfate formation from London Fog to Chinese haze, *Proc Natl Acad Sci U S A*, 113, 13630-13635, 10.1073/pnas.1616540113, 2016.

Xie, Y., Ding, A., Nie, W., Mao, H., Qi, X., Huang, X., Xu, Z., Kerminen, V.-M., Petäjä, T., Chi, X., Virkkula, A., Boy, M., Xue, L., Guo, J., Sun, J., Yang, X., Kulmala, M., and Fu, C.: Enhanced sulfate formation by nitrogen dioxide: Implications from in situ observations at the SORPES station, *Journal of Geophysical Research: Atmospheres*, 120, 12679-12694, 10.1002/2015jd023607, 2015.

Yabushita, A., Enami, S., Sakamoto, Y., Kawasaki, M., Hoffmann, M. R., and Colussi, A. J.: Anion-Catalyzed Dissolution of  $\text{NO}_2$  on Aqueous Microdroplets, *J. Phys. Chem. A*, 113, 4844-4848, 10.1021/jp900685f, 2009.
